# Supplementary material for: Development of pH-Responsive Hyaluronic Acid-Conjugated Cyclodextrin Nanoparticles for Chemo-/CO-Gas Dual Therapy
Source: MDPI journal article supplement (doi:10.3390/pharmaceutics15071818), 2023-06-25
Supplement: s1 [file s1]

## Supplementary Data

### **Development of pH-responsive hyaluronic acid-conjugated cyclodextrin nanoparticles for chemo-/CO-gas dual therapy**

Eunsol Lee <sup>1</sup>, Eun Seong Lee <sup>1,2,\*</sup>

<sup>1</sup>Department of Biotechnology, The Catholic University of Korea, 43 Jibong-ro, Bucheon-si 1462, Gyeonggi-do, Korea; eunsollee13@gmail.com (E.L.); eslee@catholic.ac.kr (E.S.L.)

<sup>2</sup>Department of Biomedical-Chemical Engineering, The Catholic University of Korea, 43 Jibong-ro, Bucheon-si 1462, Gyeonggi-do, Korea; eslee@catholic.ac.kr (E.S.L.)

\*To whom correspondence should be addressed.

Tel: +82-2-2164-4921, Fax: +82-2-2164-4865

E-mail: eslee@catholic.ac.kr

## Supplementary Information

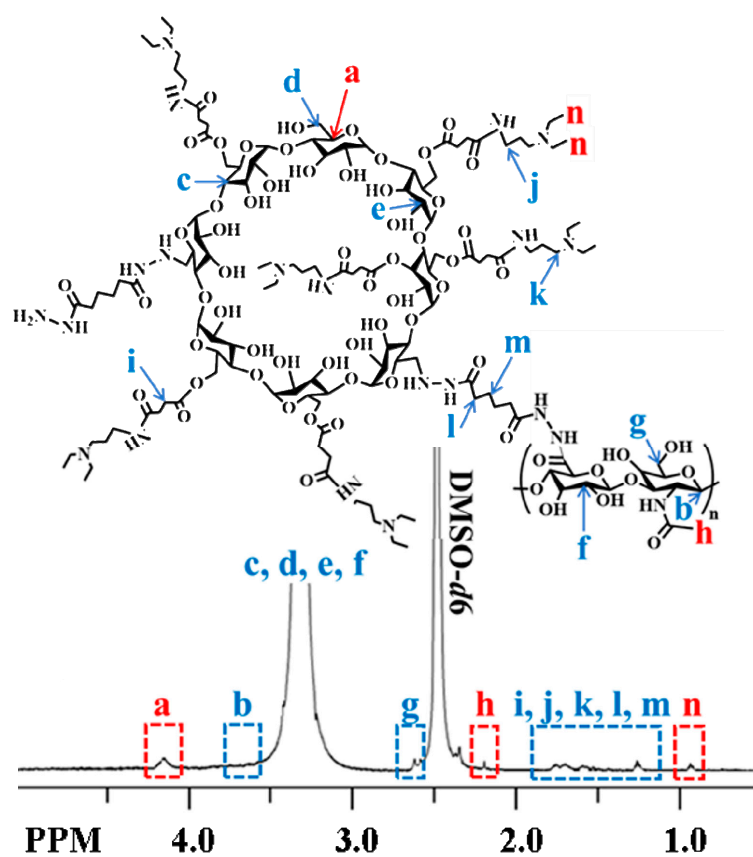

**Figure. S1.**  $^1\text{H}$ -NMR peaks of  $\gamma\text{CD}-(\text{DEAP}_{3.4}/\text{HA}_{2.1})$ .

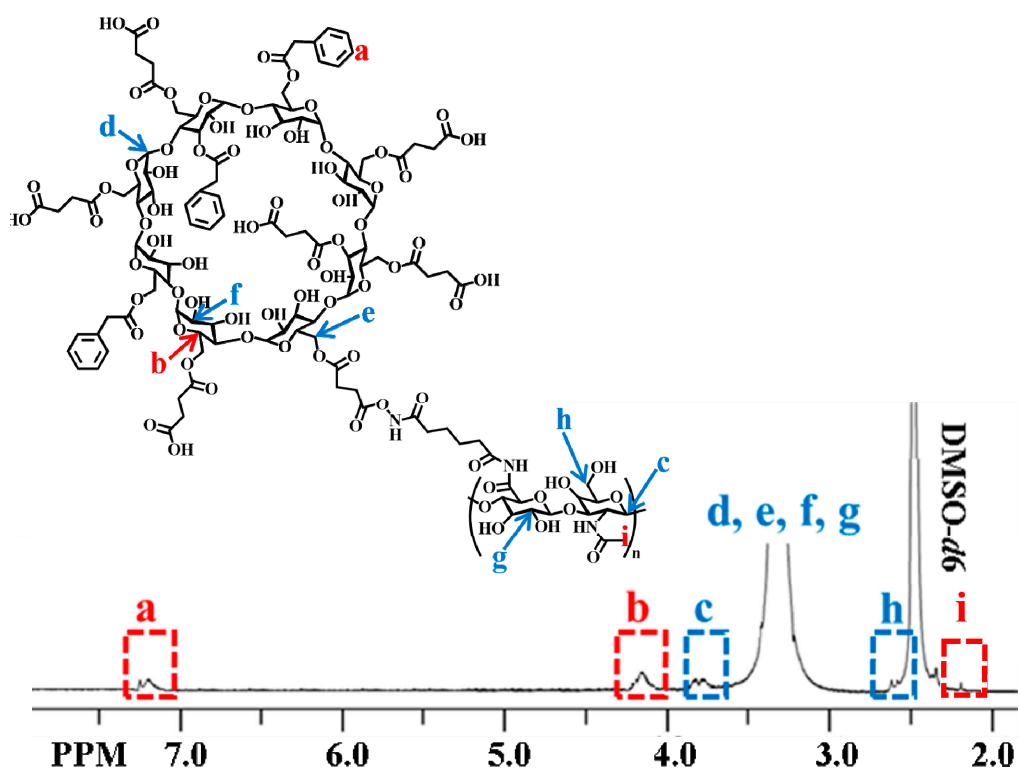

**Figure. S2.** <sup>1</sup>H-NMR peaks of  $\gamma$ CD-(PA<sub>4.2</sub>/HA<sub>2.0</sub>).

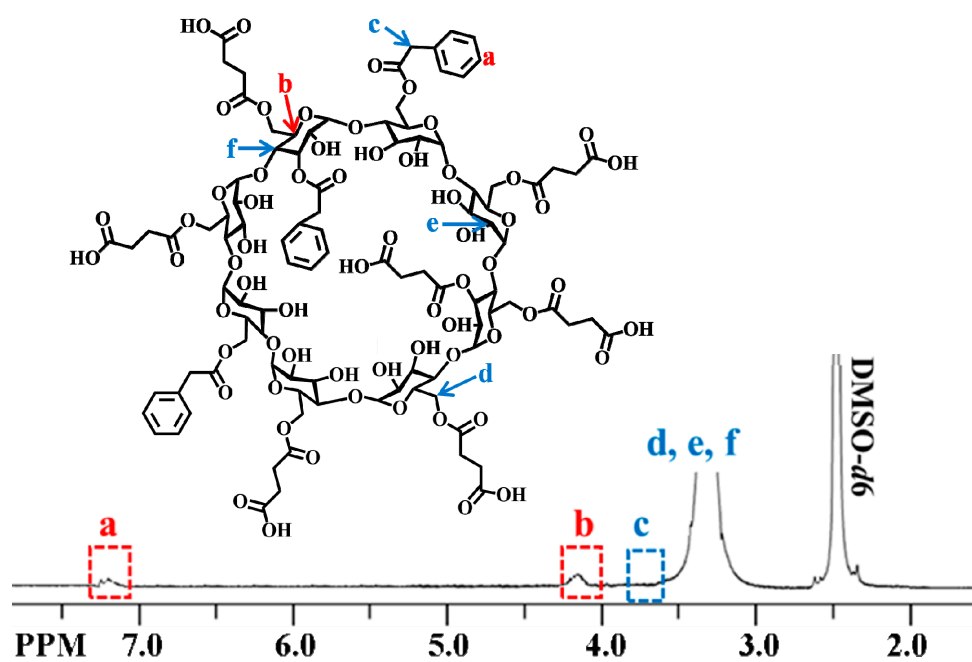

**Figure. S3.** <sup>1</sup>H-NMR peaks of  $\gamma$ CD-(PA<sub>4.2</sub>).



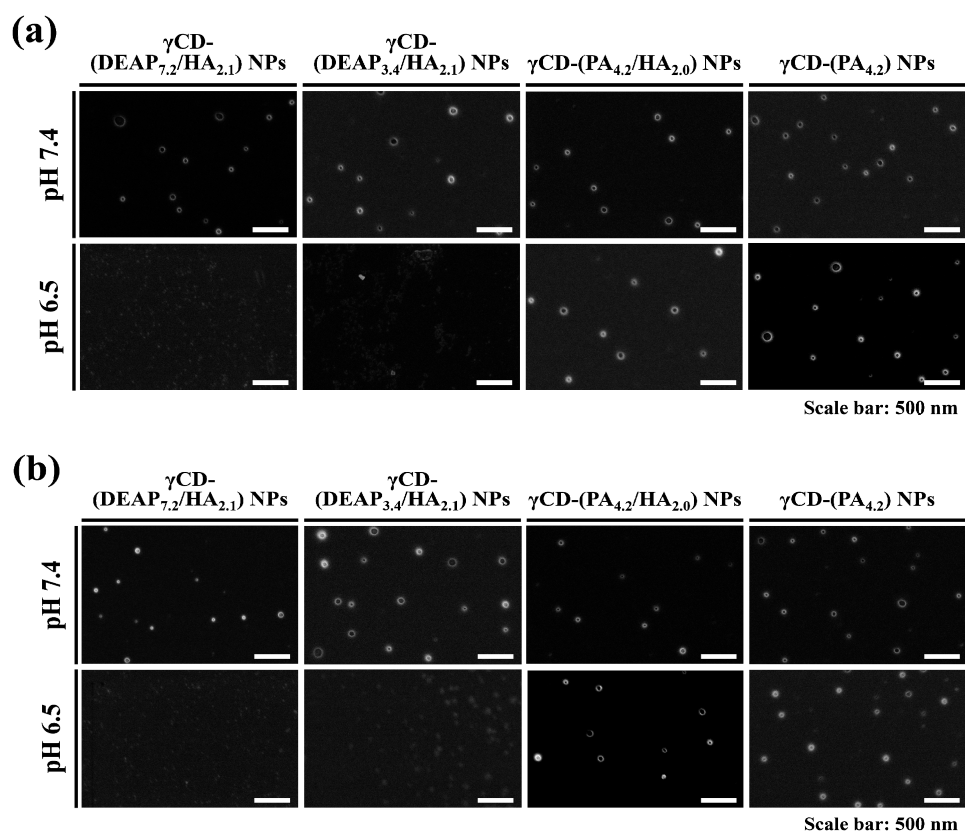

**Figure. S4.** FE-SEM images of  $\gamma\text{CD}-(\text{DEAP}_{7.2}/\text{HA}_{2.1})$  NPs,  $\gamma\text{CD}-(\text{DEAP}_{3.4}/\text{HA}_{2.1})$  NPs,  $\gamma\text{CD}-(\text{PA}_{4.2}/\text{HA}_{2.0})$  NPs, and  $\gamma\text{CD}-(\text{PA}_{4.2})$  NPs at pH 7.4 and 6.5 **(a)** without laser irradiation and **(b)** under laser irradiation at a light intensity of 1 W/cm<sup>2</sup> for 10 min.

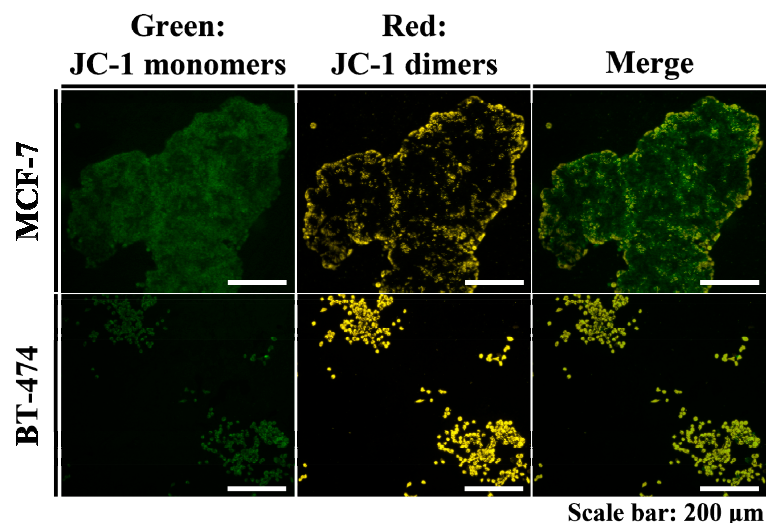

**Figure. S5.** Mitochondrial membrane hyperpolarization of MCF-7 or BT-474 cells treated with (PTX/FeCO) $\gamma$ CD-(DEAP<sub>7.2</sub>/HA<sub>2.1</sub>) NPs. In brief, the MCF-7 or BT-474 tumor cells were incubated with (PTX/FeCO) $\gamma$ CD-(DEAP<sub>7.2</sub>/HA<sub>2.1</sub>) NPs, with an equivalent FeCO concentration of 6.75  $\mu\text{g/mL}$ , at 37  $^{\circ}\text{C}$  for 4 h. Subsequently, the cells were washed with fresh PBS (pH 7.4) and exposed to 808 nm irradiation at a power density of 0.5  $\text{W/cm}^2$  for 10 min. Afterward, the resulting cells ( $1 \times 10^6$  cells) were treated with 1,1',3,3'-tetraethyl-5,5',6,6'-tetrachloroimidacarbocyanine iodide (JC-1) at a concentration of 0.25  $\mu\text{g/mL}$  for 20 min. The cells were then examined using a fluorescence microscope to analyze the mitochondrial membrane hyperpolarization. The JC-1 dye used in this experiment was purchased from Sigma-Aldrich (St. Louis, MO, USA).
